# Supplementary material for: Menke-Hennekam syndrome; delineation of domain-specific subtypes with distinct clinical and DNA methylation profiles
Source: PubMed Central journal article supplement (PMC11040166; doi:10.1016/j.xhgg.2024.100287), 2024-03-29
Supplement: mmc1.pdf [file mmc1.pdf]

## **Supplemental information**

### **Menke-Hennekam syndrome; delineation of domain-specific subtypes with distinct clinical and DNA methylation profiles**

**Sadegheh Haghshenas, Hidde J. Bout, Josephine M. Schijns, Michael A. Levy, Jennifer Kerkhof, Pratibha Bhai, Haley McConkey, Zandra A. Jenkins, Ella M. Williams, Benjamin J. Halliday, Sylvia A. Huisman, Peter Lauffer, Vivian de Waard, Laura Witteveen, Siddharth Banka, Angela F. Brady, Elena Galazzi, Julien van Gils, Anna C.E. Hurst, Frank J. Kaiser, Didier Lacombe, Antonio F. Martinez-Monseny, Patricia Fergelot, Fabíola P. Monteiro, Ilaria Parenti, Luca Persani, Fernando Santos-Simarro, Brittany N. Simpson, MKHK Research Consortium, Mariëlle Alders, Stephen P. Robertson, Bekim Sadikovic, and Leonie A. Menke**

## Table of contents

|                                                                                                                                                                                                                                |    |
|--------------------------------------------------------------------------------------------------------------------------------------------------------------------------------------------------------------------------------|----|
| Figure S1. Lateral facial and distal limb morphology of the presently described individuals with a variant in the MKHK region of <i>CREBBP</i> and <i>EP300</i> . .....                                                        | 2  |
| Table S1. Summary of the 3-step process for the selection of probes .....                                                                                                                                                      | 8  |
| Table S2. Morphological characteristics of individuals with a confirmed MKHK methylation profile or epesignature (in ID4) per MKHK subtype. ....                                                                               | 8  |
| Table S3 (see excel file). Clinical characteristics and morphological features of the presently described individuals with a variant in the MKHK region of <i>CREBBP</i> and <i>EP300</i> . ....                               | 9  |
| Table S4 (see excel file). Genotypes, epesignatures and in silico prediction scores of all presently described individuals with a variant in the MKHK region of <i>CREBBP</i> (NM_004380.2) or <i>EP300</i> (NM_001429.3)..... | 9  |
| Table S5. List of identified differentially methylated regions. ....                                                                                                                                                           | 10 |
| References .....                                                                                                                                                                                                               | 12 |

**Figure S1. Lateral facial and distal limb morphology of the presently described individuals with a variant in the MKHK region of *CREBBP* and *EP300*.**

The lateral facial characteristics, the hands and feet of individuals with a variant in (A) the ZZ-domain, (B) TAZ2-domain, (C) ID4, and (D) in between the ZZ and TAZ2-domain (C.ZT.1 en C.ZT.2) and in between TAZ2 and ID4 (C.TI.29). Study numbers are depicted within each photograph reflecting the affected gene (C or E representing *CREBBP* and *EP300*) and domain (Z, T, I, ZT, and TI representing ZZ, TAZ2, ID4, the region between ZZ and TAZ2, and the region between TAZ2 and ID4, respectively) followed by a unique number. The study numbers of individuals with a confirmed MKHK epismutation or methylation profile are displayed in bold, and of individuals who were tested, but in whom no MKHK epismutation or methylation profile was found, in italics. Detailed description of facial and distal limb morphology of all individuals can be found in Table S3.

A

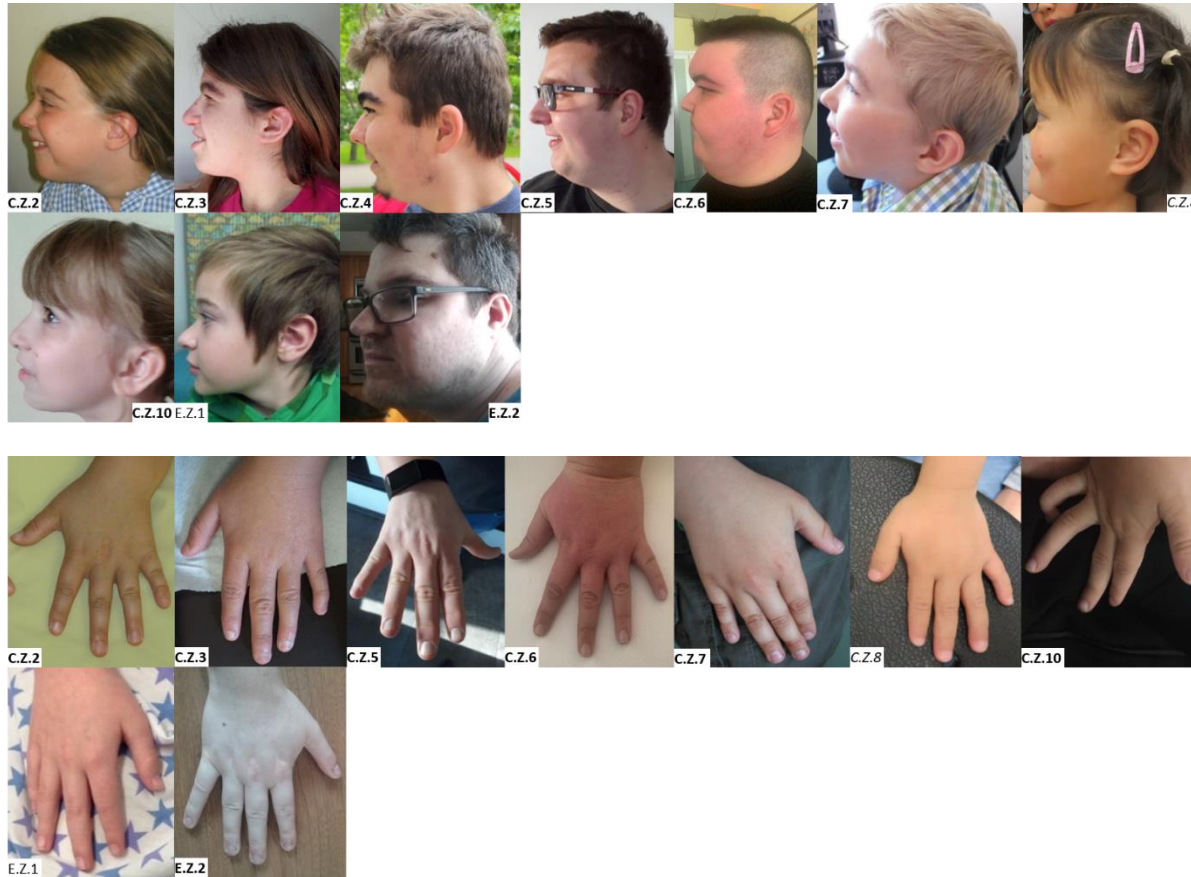

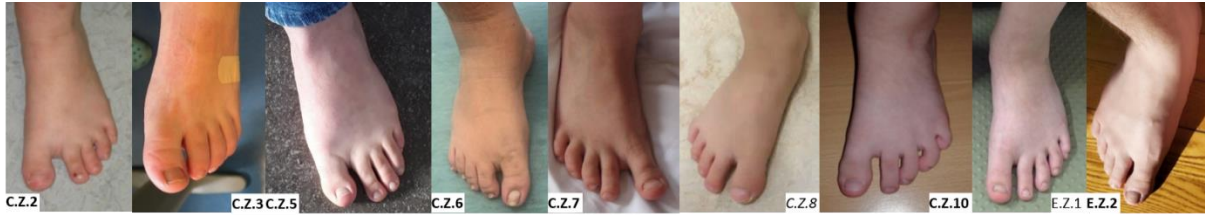

B

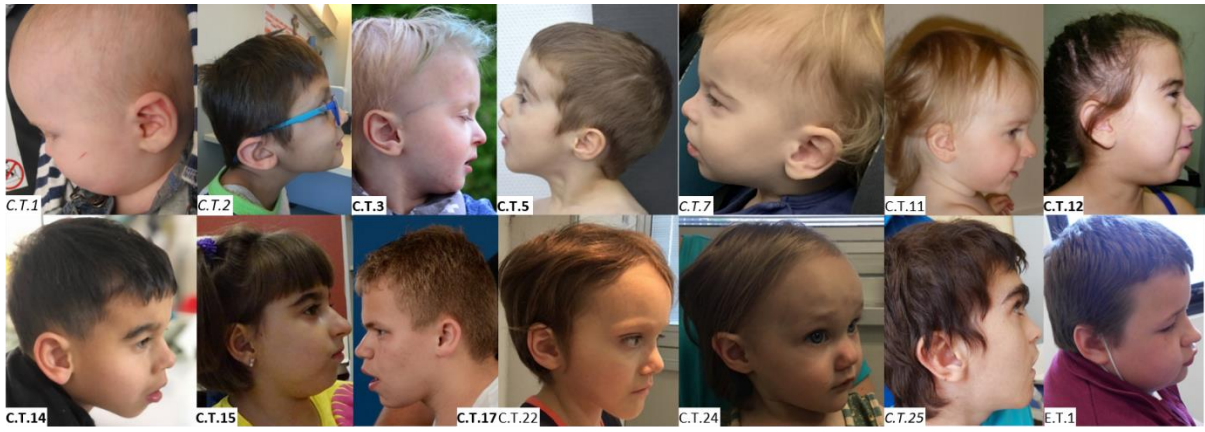

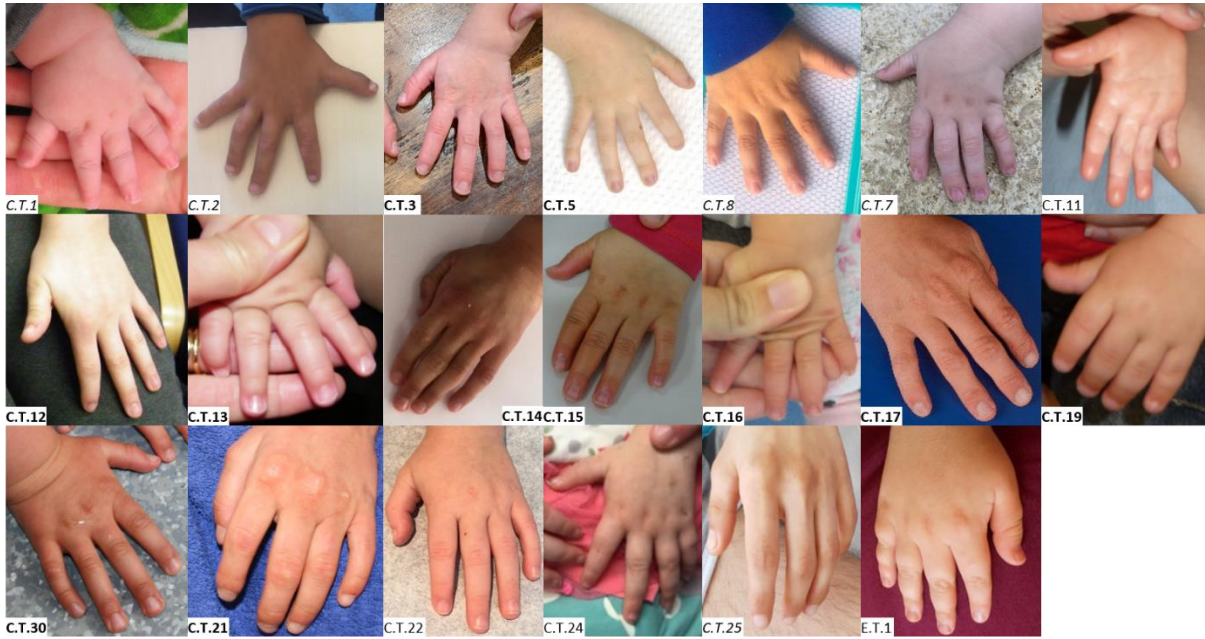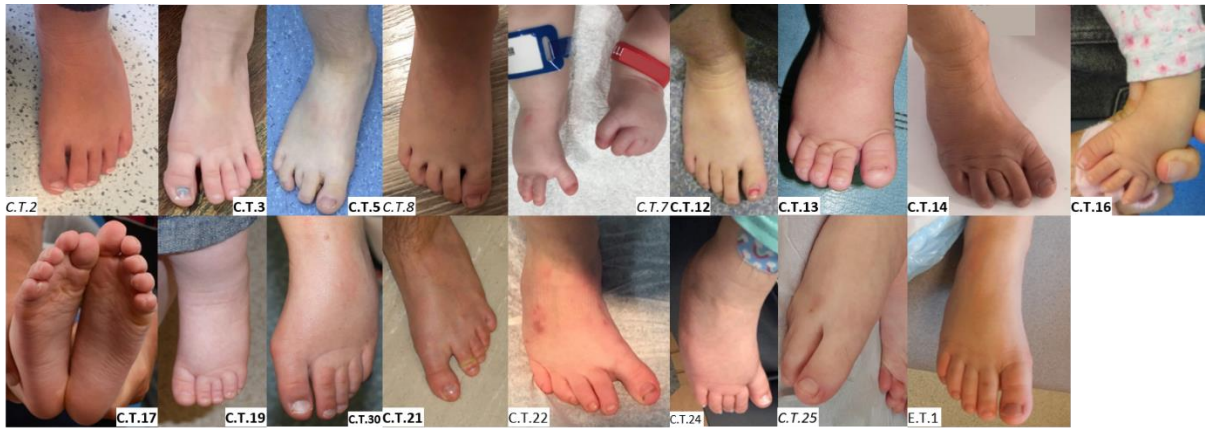

C

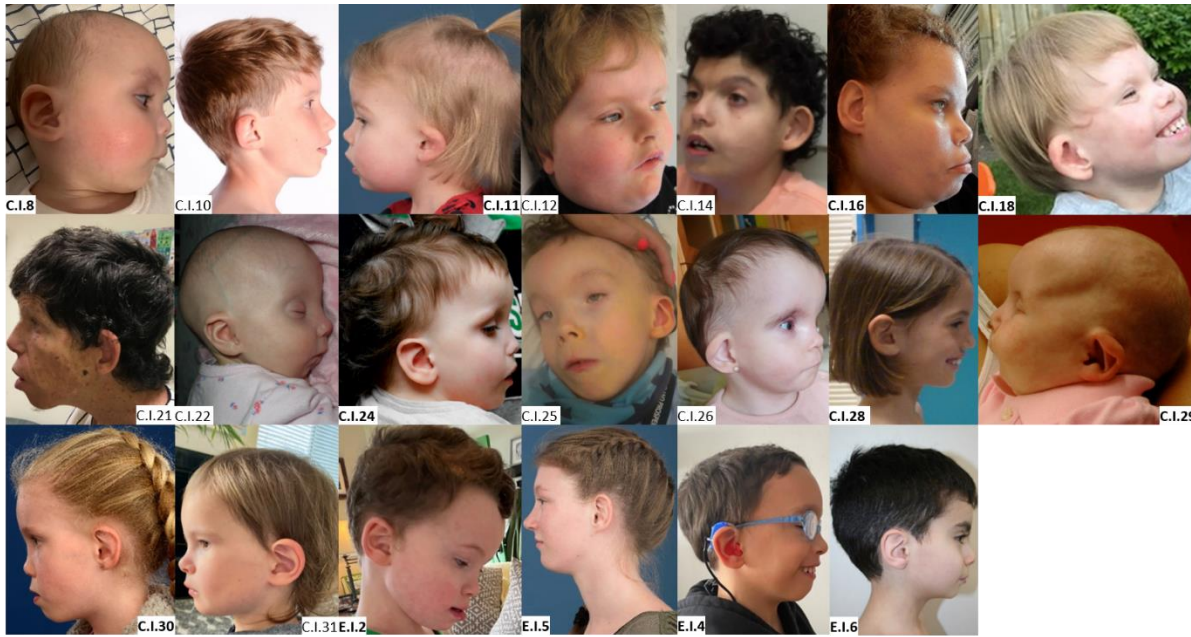

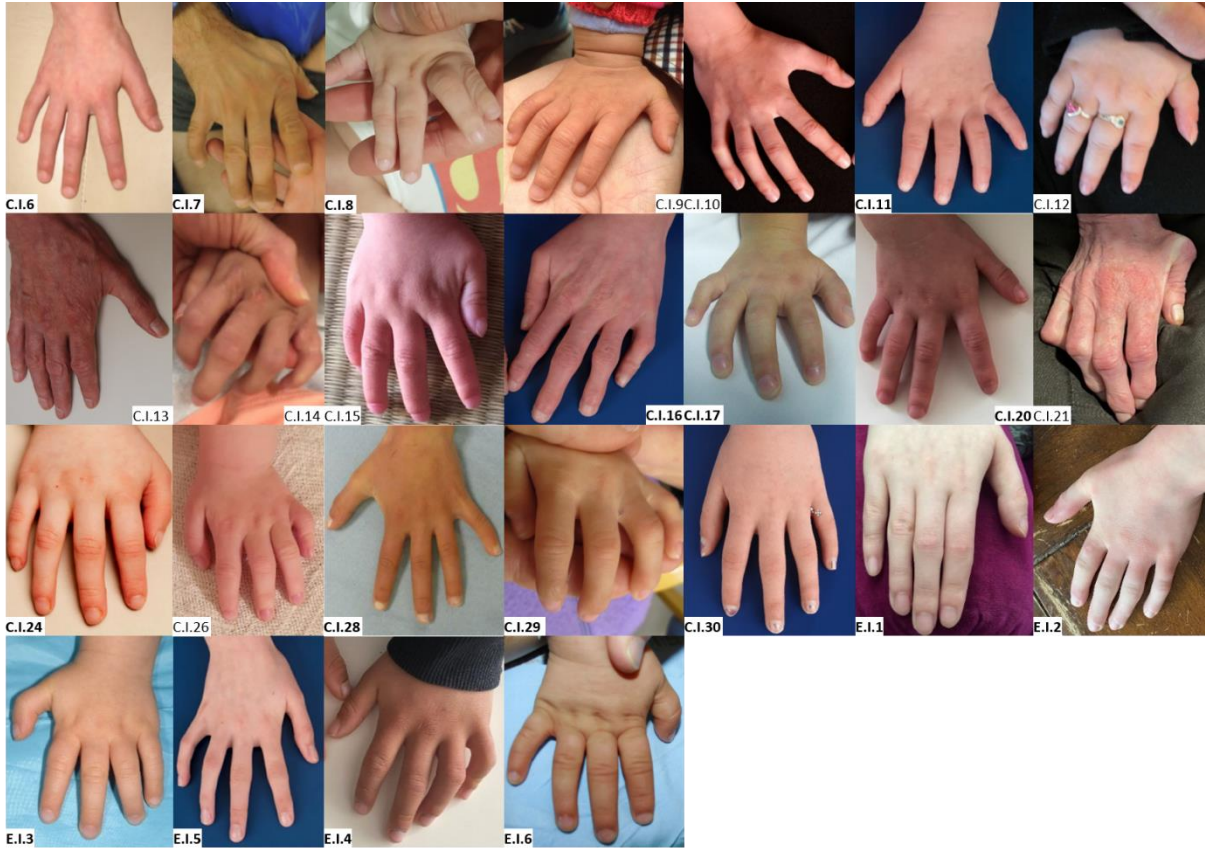

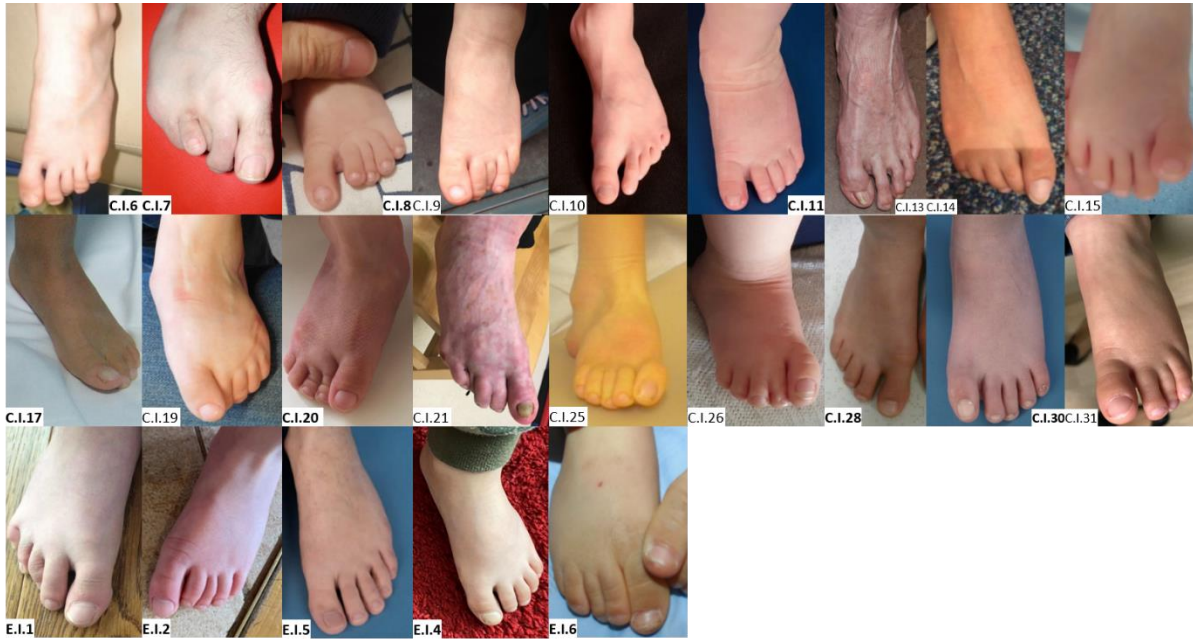

D

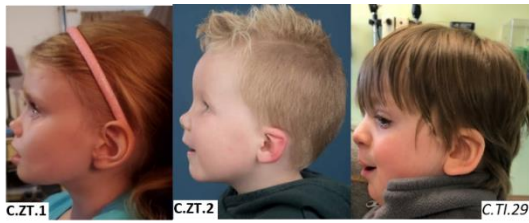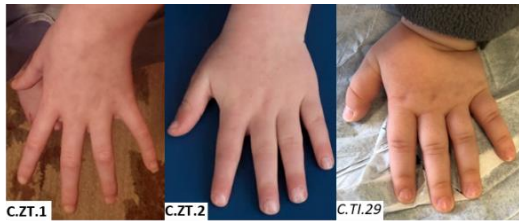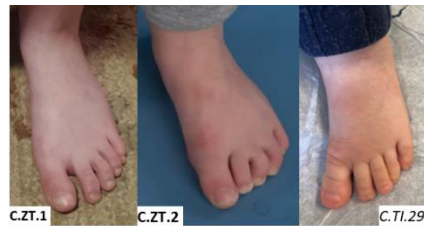



**Table S1. Summary of the 3-step process for the selection of probes**

| Episignature | Number of probes after the first step | Number of probes after the second step | Cut-off value for correlation |
|--------------|---------------------------------------|----------------------------------------|-------------------------------|
| MKHK_ZZ      | 1000                                  | 333                                    | 0.85                          |
| MKHK_TAZ2    | 900                                   | 225                                    | 0.75                          |
| MKHK_ID4     | 900                                   | 225                                    | 0.75                          |

**Table S2. Morphological characteristics of individuals with a confirmed MKHK methylation profile or episignature (in ID4) per MKHK subtype.**

ZZ, zinc finger ZZ-type; TAZ2, zinc finger TAZ-type; ID4, first  $\alpha$ -helix of the fourth intrinsically disordered region of CBP/p300.

|                                               | MKHK-ZZ<br>(n=9)                  | MKHK-TAZ2 (n=14)                      | MKHK-ID4<br>(n=21)                           |
|-----------------------------------------------|-----------------------------------|---------------------------------------|----------------------------------------------|
| Sparse hair                                   | 0/9                               | 3/12 (25%)                            | 10/19 (53%)                                  |
| Prominent forehead                            | 2/9 (22%)                         | 4/13 (31%)                            | 15/20(75%)                                   |
| Face, square (FS) or flat (FF)                | FF 1/9 (11%)<br>FS 1/9 (11%)      | FF 1/13 (8%)<br>FS 2/13 (15%)         | FF 6/20 (30%)<br>FS 6/20 (30%)               |
| Thick eyebrows                                | 5/9 (56%)                         | 7/13 (54%)                            | 6/21 (29%)                                   |
| Flared eyebrows                               | 5/9 (56%)                         | 0/13                                  | 0/18                                         |
| Telecanthi (T)/ epicanthi (E)                 | T 2/9 (22%)<br>E 2/9 (22%)        | T 2/14 (14%)<br>E 5/14 (36%)          | T 7/21 (33%)<br>E 7/21 (33%)                 |
| Palpebral fissures Up (U)- or downslanted (D) | U 0/7<br>D 1/7 (14%)              | U 1/13 (8%)<br>D 2/13 (15%)           | U 15/21 (71%)<br>D 0/21                      |
| Short palpebral fissures                      | 1/9 (11%)                         | 2/14 (14%)                            | 15/21 (71%)                                  |
| Ptosis/ Blepharophimosis                      | 4/8 (50%)                         | 5/11 (45%)                            | 15/21 (71%)                                  |
| Long eyelashes                                | 3/9 (33%)                         | 5/12 (42%)                            | 5/20 (25%)                                   |
| Ears Low-set (L) / Short (S)                  | L 0/8<br>S 0/8                    | L 2/9 (22%)<br>S 1/9 (11%)            | L 6/19 (32%)<br>S 1/19 (5%)                  |
| Protruding ears (upper part)                  | 0/9                               | 3/12 (25%)                            | 13/20 (65%)                                  |
| Overfolded helix                              | 1/8 (13%)                         | 1/11 (9%)                             | 8/19 (42%)                                   |
| Absent earlobe                                | 0/8                               | 1/11 (9%)                             | 2/19 (10%)                                   |
| Full cheeks                                   | 4/9 (44%)                         | 3/14 (21%)                            | 10/21 (48%)                                  |
| Malar flattening                              | 0/9                               | 1/12 (8%)                             | 8/18 (44%)                                   |
| Short nose                                    | 2/9 (22%)                         | 2/14 (14%)                            | 11/21 (52%)                                  |
| Depressed nasal bridge                        | 1/9 (11%)                         | 0/12                                  | 9/18 (50%)                                   |
| Narrow nasal bridge                           | 1/9 (11%)                         | 2/14 (14%)                            | 2/21 (9%)                                    |
| Depressed nasal ridge                         | 0/9                               | 1/12 (7%)                             | 10/18 (56%)                                  |
| Broad nasal tip                               | 3/9 (33%)                         | 8/14 (57%)                            | 12/21 (57%)                                  |
| Short columella                               | 0/8                               | 3/13 (23%)                            | 14/21 (67%)                                  |
| Anteverted nares                              | 1/9 (11%)                         | 4/14 (29%)                            | 11/21 (52%)                                  |
| Underdeveloped alae nasi                      | 0/9                               | 1/13 (8%)                             | 1/21 (5%)                                    |
| Philtrum Short (S)/Long (L)/Deep (D)          | S 1/9 (11%)<br>L 1/9 (11%)<br>D 0 | S 0/13<br>L 5/13 (38%)<br>D 1/13 (8%) | S 1/21 (5%)<br>L 13/21 (62%)<br>D 4/21 (19%) |
| Everted vermilion of upper lip                | 1/9 (11%)                         | 2/13 (15%)                            | 4/21 (19%)                                   |
| Thin vermilion of upper lip                   | 5/9 (56%)                         | 4/13 (31%)                            | 6/21 (29%)                                   |
| High palate                                   | 6/7 (86%)                         | 1/10 (10%)                            | 10/17 (59%)                                  |
| Missing teeth                                 | 2/8 (25%)                         | 0/8                                   | 3/10 (30%)                                   |
| Retro- or micrognathia                        | 1/9 (11%)                         | 5/12 (42%)                            | 5/19 (26%)                                   |
| Ulnar deviation of finger(s)                  | 0/7                               | 0/13                                  | 3/20 (15%)                                   |
| Clinodactyly fifth finger                     | 1/9 (11%)                         | 2/11 (18%)                            | 8/20 (40%)                                   |
| Tapering fingers                              | 0/6                               | 0/13                                  | 2/20 (10%)                                   |
| Prominent digital pads                        | 0/6                               | 1/8 (13%)                             | 4/15 (27%)                                   |
| Sandal gap                                    | 3/6 (50%)                         | 3/11 (27%)                            | 5/18 (28%)                                   |
| Overlapping toes                              | 0/6                               | 3/13 (23%)                            | 6/19 (32%)                                   |
| Halluces Broad (B)/Narrow (N)                 | 0/5                               | B 2/12 (17%)<br>N 1/12 (8%)           | B 3/18 (17%)<br>N 1/18 (6%)                  |
| Fibular deviation distal phalanx halluces     | 0/6                               | 2/12 (17%)                            | 8/20 (40%)                                   |
| Cutaneous partial syndactyly of toes          | 0/6                               | 2/12 (17%)                            | 5/18 (28%)                                   |

**Table S3 (see excel file). Clinical characteristics and morphological features of the presently described individuals with a variant in the MKHK region of *CREBBP* and *EP300*.**

The columns of individuals for whom a DNA sample was available are green colored if the diagnosis of the MKHK-subtype was confirmed by episignature testing, and orange colored in case the episignature result did not show any MKHK episignature. <sup>a</sup> Menke et al. 2016<sup>1</sup>; <sup>b</sup> Menke et al. 2018<sup>2</sup>; <sup>c</sup> Angius et al. 2019<sup>3</sup>; <sup>d</sup> Banka et al. 2019.<sup>4</sup> ADHD, attention deficit hyperactivity disorder; ASD, autism spectrum disorder; ASDsf: some features of ASD; ASd: atrial septal defect; BMI, body mass index; DMII, diabetes mellitus type 2; Dpt, diopters; eTSH, elevated thyroid stimulating hormone; GE, gastro-esophageal; GHD, growth hormone deficiency; GI, gastrointestinal; G-tube, gastric tube; ID, intellectual disability; IVC, inferior vena cava; LT, low testosterone level; n.a.; not available; OD, right eye; OFC, occipito-frontal circumference; OS, left eye; PDA, patent ductus arteriosus; PEG, percutaneous gastrostomy; PE-tubes, pressure equalizing tubes; PFO, patent foramen ovale; PVL, periventricular leucomalacia; PVS, Pulmonary valve stenosis; RRTI, recurrent respiratory tract infections; RUTI, recurrent urinary tract infections; SDS, standard deviation score; TSH, thyroid stimulating hormone; TVP, tricuspid valve prolapse; VSD, ventricle septal defect; VUR, vesicoureteral reflux.

**Table S4 (see excel file). Genotypes, episignatures and in silico prediction scores of all presently described individuals with a variant in the MKHK region of *CREBBP* (NM\_004380.2) or *EP300* (NM\_001429.3).**

ZZ, Zinc-finger ZZ-type; TAZ2, Zinc-finger TAZ-type; ID4, first  $\alpha$ -helix of the fourth intrinsically disordered region. <sup>a</sup>GnomAD: number represents how many times the allele was seen in gnomAD (Genome Aggregation Database) with '.' representing not seen, which is slightly different than '0' (seen but filtered out in the final gnomAD population). CADD, Combined Annotation Dependent Depletion; REVEL, Rare Exome Variant Ensemble Learner; SIFT, Sorting Intolerant From Tolerant; PolyPhen, Polymorphism Phenotyping; MPC, 'Missense badness, PolyPhen-2 and Constraint'.

**Table S5. List of identified differentially methylated regions.**

| Chromosome | Start    | End      | Width | Number of CpGs | Stouffer | Fisher   | Maximum difference | Mean difference | Overlapping gene(s)                          |
|------------|----------|----------|-------|----------------|----------|----------|--------------------|-----------------|----------------------------------------------|
| chr17      | 40822424 | 40824241 | 1818  | 8              | 6,98E-77 | 2,55E-73 | 0,22913            | 0,167478        | PLEKHH3                                      |
| chr6       | 26195488 | 26197606 | 2119  | 8              | 9,12E-36 | 1,53E-57 | -0,25391           | -0,10266        | AL031777.2,H3C4                              |
| chr6       | 27858545 | 27859478 | 934   | 6              | 1,67E-12 | 1,07E-27 | -0,1179            | -0,05217        | H3C12                                        |
| chr7       | 27169136 | 27171391 | 2256  | 21             | 1,15E-21 | 3,8E-26  | -0,13849           | -0,0732         | HOXA3,HOXA-AS2,HOXA4,AC004080.6,HOXA-AS3     |
| chr5       | 42756102 | 42757815 | 1714  | 11             | 1,26E-13 | 4,4E-24  | -0,1223            | -0,05729        | CCDC152                                      |
| chr6       | 27782126 | 27783336 | 1211  | 6              | 1,53E-11 | 1,74E-19 | -0,1646            | -0,06806        | H2AC14,H2BC14                                |
| chr17      | 14205882 | 14207968 | 2087  | 15             | 1,14E-13 | 4,14E-19 | -0,12428           | -0,05383        | HS3ST3B1,AC005224.3                          |
| chr5       | 1,5E+08  | 1,5E+08  | 1504  | 10             | 2,12E-11 | 1,05E-14 | 0,116828           | 0,05455         | CAMK2A                                       |
| chr19      | 11517079 | 11517953 | 875   | 7              | 5,16E-07 | 1,64E-14 | 0,142259           | 0,066341        | RGL3                                         |
| chr12      | 58131345 | 58133008 | 1664  | 9              | 5,13E-09 | 5,41E-14 | -0,18415           | -0,08062        | AGAP2,TSPAN31                                |
| chr1       | 1,57E+08 | 1,57E+08 | 1268  | 6              | 5,09E-12 | 8,5E-14  | -0,14              | -0,07838        | TTC24                                        |
| chr6       | 26224668 | 26226256 | 1589  | 11             | 8,64E-12 | 1,97E-13 | -0,1307            | -0,0787         | H3C6                                         |
| chr12      | 1641924  | 1643253  | 1330  | 5              | 2,4E-06  | 7,74E-12 | 0,108645           | 0,056643        | WNT5B                                        |
| chr9       | 98314632 | 98315816 | 1185  | 6              | 2,28E-06 | 4,09E-11 | -0,109             | -0,05646        |                                              |
| chr1       | 27675587 | 27676652 | 1066  | 7              | 3,33E-12 | 4,22E-11 | -0,09359           | -0,06941        | SYTL1                                        |
| chr10      | 70321243 | 70322874 | 1632  | 9              | 4,52E-06 | 1,54E-10 | -0,11566           | -0,05487        | TET1                                         |
| chr19      | 55660514 | 55661872 | 1359  | 6              | 7,63E-10 | 2,9E-10  | 0,156144           | 0,086835        | TNNT1                                        |
| chr1       | 2,36E+08 | 2,36E+08 | 785   | 6              | 5,47E-09 | 2,16E-09 | 0,109219           | 0,064921        | GNG4                                         |
| chr22      | 42394048 | 42395340 | 1293  | 11             | 1,72E-05 | 4,77E-09 | 0,115519           | 0,060151        | SEPTIN3,WBP2NL                               |
| chr3       | 1,94E+08 | 1,94E+08 | 691   | 7              | 2,62E-10 | 9,62E-09 | -0,11353           | -0,08543        | LINC00887                                    |
| chr1       | 11708564 | 11709491 | 928   | 5              | 5,48E-07 | 1,85E-08 | 0,093936           | 0,051314        | FBXO2                                        |
| chr3       | 42846594 | 42847116 | 523   | 5              | 1,09E-06 | 2,84E-08 | -0,11095           | -0,05701        | AC099329.1,ACKR2                             |
| chr3       | 1,41E+08 | 1,41E+08 | 544   | 6              | 1,94E-08 | 2,86E-08 | -0,0906            | -0,06869        | ZBTB38                                       |
| chr5       | 79552470 | 79553606 | 1137  | 5              | 1,92E-08 | 4,09E-08 | -0,11464           | -0,069          |                                              |
| chr5       | 83016630 | 83017921 | 1292  | 11             | 9,31E-07 | 4,18E-08 | -0,09717           | -0,05656        | HAPLN1                                       |
| chr17      | 46719276 | 46720386 | 1111  | 5              | 6,27E-08 | 5,18E-08 | 0,083397           | 0,055208        | AC103702.2                                   |
| chr1       | 2,35E+08 | 2,35E+08 | 645   | 5              | 1,48E-06 | 1,18E-07 | -0,08859           | -0,05036        |                                              |
| chr1       | 6514605  | 6516324  | 1720  | 5              | 9,55E-07 | 2,09E-07 | 0,096204           | 0,061211        | ESPN                                         |
| chr2       | 2,43E+08 | 2,43E+08 | 481   | 5              | 4,77E-06 | 8,9E-07  | 0,081801           | 0,05709         |                                              |
| chr12      | 54412506 | 54413936 | 1431  | 8              | 6,44E-07 | 2,07E-06 | 0,099361           | 0,065565        | AC012531.3,HOXC6,HOXC4,AC012531.2,AC012531.1 |
| chr10      | 21798341 | 21799395 | 1055  | 6              | 2,59E-06 | 7,25E-06 | -0,09209           | -0,06279        |                                              |
| chr17      | 17109640 | 17110641 | 1002  | 11             | 6,46E-06 | 7,78E-06 | 0,097594           | 0,066414        | MPRIP,PLD6,AC055811.2                        |
| chr18      | 22907319 | 22908222 | 904   | 5              | 5,9E-05  | 8,46E-06 | -0,12209           | -0,07057        | ZNF521                                       |
| chr1       | 63249197 | 63249705 | 509   | 7              | 0,002966 | 9,24E-06 | 0,113212           | 0,053852        |                                              |
| chr1       | 86043795 | 86044230 | 436   | 6              | 2,59E-05 | 1,07E-05 | -0,09664           | -0,06059        | DDAH1,AC092807.4,AC092807.3                  |
| chr9       | 35791475 | 35792382 | 908   | 6              | 9,94E-05 | 1,16E-05 | -0,10736           | -0,05536        | NPR2                                         |
| chr15      | 99408636 | 99409957 | 1322  | 10             | 2,89E-06 | 1,37E-05 | 0,068171           | 0,053442        | IGF1R                                        |
| chr19      | 36004632 | 36005395 | 764   | 6              | 4,15E-05 | 1,84E-05 | 0,091674           | 0,060381        |                                              |
| chr2       | 1,64E+08 | 1,64E+08 | 716   | 7              | 1,17E-06 | 1,95E-05 | -0,09102           | -0,06841        |                                              |
| chr5       | 1245669  | 1246795  | 1127  | 6              | 2,37E-05 | 2,18E-05 | 0,094337           | 0,063162        | SLC6A18                                      |

|       |          |          |      |    |          |          |          |          |                      |
|-------|----------|----------|------|----|----------|----------|----------|----------|----------------------|
| chr17 | 78734663 | 78735596 | 934  | 6  | 3,78E-05 | 3,15E-05 | 0,086993 | 0,054553 | RPTOR                |
| chr1  | 27683139 | 27683912 | 774  | 7  | 6,69E-06 | 3,29E-05 | 0,064924 | 0,052358 | MAP3K6               |
| chr19 | 51165207 | 51165845 | 639  | 5  | 3,59E-05 | 3,3E-05  | 0,083174 | 0,061784 | SHANK1               |
| chr11 | 1769152  | 1770066  | 915  | 9  | 7,68E-05 | 3,45E-05 | 0,079182 | 0,051487 | IFITM10,AC068580.4   |
| chr19 | 50249464 | 50249927 | 464  | 5  | 0,000347 | 4,02E-05 | 0,12787  | 0,07806  | TSKS                 |
| chr4  | 4763259  | 4763753  | 495  | 7  | 2,36E-05 | 6E-05    | -0,11503 | -0,05714 | STX18-AS1            |
| chr1  | 1289806  | 1291064  | 1259 | 8  | 5,16E-06 | 6,02E-05 | 0,097064 | 0,058265 | MXRA8                |
| chr11 | 18477153 | 18478135 | 983  | 7  | 8,57E-05 | 6,3E-05  | 0,12583  | 0,062944 | LDHAL6A              |
| chr11 | 45671208 | 45672248 | 1041 | 5  | 8,1E-06  | 6,46E-05 | 0,087335 | 0,063194 | CHST1                |
| chr12 | 1,31E+08 | 1,31E+08 | 759  | 7  | 0,000119 | 8,38E-05 | 0,109142 | 0,054137 | STX2                 |
| chr9  | 1,34E+08 | 1,34E+08 | 626  | 5  | 4,07E-05 | 9,53E-05 | -0,08873 | -0,07043 |                      |
| chr19 | 49223814 | 49224454 | 641  | 5  | 3,55E-05 | 9,9E-05  | -0,0969  | -0,0565  | RASIP1               |
| chr1  | 6187633  | 6188136  | 504  | 5  | 2,65E-05 | 0,000131 | 0,099593 | 0,068783 | CHD5                 |
| chr7  | 27127448 | 27128169 | 722  | 6  | 1,99E-05 | 0,00015  | 0,067895 | 0,050098 |                      |
| chr1  | 2,44E+08 | 2,44E+08 | 1119 | 5  | 2,29E-05 | 0,000164 | 0,070203 | 0,052386 | ZBTB18               |
| chr17 | 9549496  | 9550545  | 1050 | 8  | 0,000162 | 0,000171 | -0,09224 | -0,05537 | USP43,AC118755.1     |
| chr3  | 1,84E+08 | 1,84E+08 | 634  | 7  | 0,000308 | 0,000185 | 0,124694 | 0,051593 | CHRD                 |
| chr10 | 75533025 | 75533431 | 407  | 5  | 0,000418 | 0,000299 | 0,102109 | 0,057383 | FUT11                |
| chr1  | 27718221 | 27718858 | 638  | 5  | 0,000827 | 0,0003   | 0,08923  | 0,050069 |                      |
| chr5  | 2537210  | 2537834  | 625  | 8  | 0,000111 | 0,000382 | 0,087529 | 0,053924 |                      |
| chr3  | 1,6E+08  | 1,6E+08  | 480  | 6  | 3,71E-05 | 0,000404 | -0,08339 | -0,0682  | IQCJ-SCHIP1,SCHIP1   |
| chr4  | 1,75E+08 | 1,75E+08 | 208  | 5  | 0,00032  | 0,000408 | -0,09371 | -0,06334 | LINC02269,AC106895.2 |
| chr1  | 19971709 | 19972777 | 1069 | 8  | 5,83E-05 | 0,00061  | -0,10402 | -0,06221 | NBL1,MICOS10-NBL1    |
| chr8  | 38831681 | 38832728 | 1048 | 6  | 0,001872 | 0,001269 | -0,07691 | -0,05204 | HTRA4                |
| chr11 | 834676   | 835377   | 702  | 5  | 0,004198 | 0,001496 | 0,113156 | 0,061579 | CD151                |
| chr19 | 50861774 | 50862121 | 348  | 5  | 0,000291 | 0,001703 | 0,080581 | 0,060911 | NR1H2,NAPSA          |
| chr6  | 1,64E+08 | 1,64E+08 | 715  | 6  | 0,000407 | 0,001772 | -0,09124 | -0,06431 | AL078602.1           |
| chr12 | 9217079  | 9217907  | 829  | 11 | 0,001172 | 0,002018 | -0,10539 | -0,06154 | LINC00612,A2M-AS1    |
| chr11 | 396686   | 397486   | 801  | 5  | 0,000753 | 0,002831 | 0,095488 | 0,070649 | PKP3                 |
| chr1  | 1,12E+08 | 1,12E+08 | 474  | 6  | 0,001355 | 0,005106 | 0,063995 | 0,052387 | C1orf162             |
| chr1  | 47900197 | 47900327 | 131  | 5  | 0,003204 | 0,006846 | 0,079071 | 0,062555 | FOXO2-AS1            |
| chr22 | 38244746 | 38244902 | 157  | 5  | 0,001669 | 0,007427 | 0,070153 | 0,055552 | ANKRD54,EIF3L        |
| chr2  | 20441905 | 20442210 | 306  | 5  | 0,005672 | 0,007602 | 0,078123 | 0,050274 |                      |
| chr10 | 1,01E+08 | 1,01E+08 | 519  | 5  | 0,001764 | 0,008912 | -0,09154 | -0,06371 |                      |

Start, genomic position of the region's start point; End, genomic position of the region's end point; Width, the width of the region; Stouffer, Stouffer summary transform of the individual CpG false discovery rates (FDRs); Fisher, Fisher combined probability transform of the individual CpG FDRs; Maximum difference: Maximum methylation difference within the DMR; Mean difference: Mean methylation difference across the DMR.

## References

1. Menke, L.A., van Belzen, M.J., Alders, M., Cristofoli, F., Ehmke, N., Fergelot, P., Foster, A., Gerkes, E.H., Hoffer, M.J., Horn, D., et al. (2016). CREBBP mutations in individuals without Rubinstein-Taybi syndrome phenotype. *Am J Med Genet A* 170, 2681-2693. 10.1002/ajmg.a.37800.
2. Menke, L.A., Gardeitchik, T., Hammond, P., Heimdal, K.R., Houge, G., Hufnagel, S.B., Ji, J., Johansson, S., Kant, S.G., Kinning, E., et al. (2018). Further delineation of an entity caused by CREBBP and EP300 mutations but not resembling Rubinstein-Taybi syndrome. *Am J Med Genet A* 176, 862-876. 10.1002/ajmg.a.38626.
3. Angius, A., Uva, P., Oppo, M., Persico, I., Onano, S., Olla, S., Pes, V., Perria, C., Cuccuru, G., Atzeni, R., et al. (2019). Confirmation of a new phenotype in an individual with a variant in the last part of exon 30 of CREBBP. *Am J Med Genet A* 179, 634-638. 10.1002/ajmg.a.61052.
4. Banka, S., Sayer, R., Breen, C., Barton, S., Pavaine, J., Sheppard, S.E., Bedoukian, E., Skraban, C., Cuddapah, V.A., and Clayton-Smith, J. (2019). Genotype-phenotype specificity in Menke-Hennekam syndrome caused by missense variants in exon 30 or 31 of CREBBP. *Am J Med Genet A* 179, 1058-1062. 10.1002/ajmg.a.61131.
